# Supplementary material for: A New Approach for Monitoring Ebolavirus in Wild Great Apes
Source: PubMed Central journal article supplement (PMC4169258; doi:10.1371/journal.pntd.0003143), 2014-09-18
Supplement: pntd.0003143.s001.pdf [file pntd.0003143.s001.pdf]

## Ebolaviruses nucleoprotein sequences

**ZEMBOV** MDRPQKIWMAPSLTESDMYHKILTAGLSVQQGIVRQRVIVPYQVNNLEEICQLIIQAF 60  
**CIEBOV** MESRAHKAWMTHTASGFETDYHKILTAGLSVQQGIVRQRVIQVHQVTNLEEICQLIIQAF 60  
**REBOV** MDRGTRRIWVSQNQGD TDLDYHKILTAGLTVQQGIVRQKIISVYLVNDLEAMCQLVIQAF 60  
**SEBOV** MDKRVRGSWALGGQSEVDLDYHKILTAGLSVQQGIVRQRVIVPYVVDNLEEGICQHIQAF 60  
**BEBOV** MDRPRIRTWMMHNTSEVEADYHKILTAGLSVQQGIVRQRIIPVYQISNLEEVCQLIIQAF 60  
\* : \* : \*\*\*\*\* :\*\*\*\*\* : \* \* : : \* \* : \* \* : \* \* \*

**ZEMBOV** EAGVDFQESADSFLMLCLHHAYQG DYKLFLESGAVKYLEGHGFRFEVKKRDGDKRLEEL 120  
**CIEBOV** EAGVDFQESADSFLMLCLHHAYQG DYKLFLESNAVKYLEGHGFRFEVKKRKEGVKRLEEL 120  
**REBOV** EAGIDFQENADSFLMLCLHHAYQG DYKLFLESNAVQYLEGHGFKFELRKKDGVNRLEEL 120  
**SEBOV** EAGVDFQDNADSFLLLLCLHHAYQG DHRFLKSDAVQYLEGHGFRFEVREKENVHRLDEL 120  
**BEBOV** EAGVDFQDSADSFLMLCLHHAYQG DYKLFLESNAVKYLEGHGFRFEMKKKEGVKRLEEL 120  
\* \* \* : \* \* \* : . \* \* \* \* \* : \* \* \* \* \* \* \* \* : : \* \* : \* \* \* : \* \* \* \* \* \* \* \* : \* \* : \* \* \* : \* \* \*

**ZEMBOV** LPAVSSGKNIKRTLAAMPEEETTEANAGQFLSFASLFLPKLVVGEKACLEKVQRQIQVHA 180  
**CIEBOV** LPAASSGKSI RRTLAAMPEEETTEANAGQFLSFASLFLPKLVVGEKACLEKVQRQIQVHS 180  
**REBOV** LPAATSGKNIRRTLAALPEEETTEANAGQFLSFASLFLPKLVVGEKACLEKVQRQIQVHA 180  
**SEBOV** LPNVTGGKNLRRTLAAMPEEETTEANAGQFLSFASLFLPKLVVGEKACLEKVQRQIQVHA 180  
**BEBOV** LPAASSGKNIKRTLAAMPEEETTEANAGQFLSFASLFLPKLVVGEKACLEKVQRQIQVHA 180  
\* \* . : \* \* . : : \* \* \* \* \* : \* \* \* \* \* \* \* \* \* \* \* \* \* \* \* \* \* \* \* \* \* \* \* \* \* \* \* \* \* \* :

**ZEMBOV** EQGLIQYPTAWQSVGHMMVIFRLMRTNFLIKFLLIHQGMHMVAGHDANDAVI S NSVAQAR 240  
**CIEBOV** EQGLIQYPTAWQSVGHMMVIFRLMRTNFLIKFLLIHQGMHMVAGHDANDAVIANSVAQAR 240  
**REBOV** EQGLIQYPTAWQSVGHMMVIFRLMRTNFLIKYLLIHQGMHMVAGHDANDAVIANSVAQAR 240  
**SEBOV** EQGLIQYPTSWQSVGHMMVIFRLMRTNFLIKFLLIHQGMHMVAGHDANDTVI S NSVAQAR 240  
**BEBOV** EQGLIQYPTSWQSVGHMMVIFRLMRTNFLIKFLLIHQGMHMVAGHDANDAVIANSVAQAR 240  
\* \* \* \* \* \* \* \* : \* \* \* \* \* \* \* \* \* \* \* \* \* \* \* \* \* \* \* \* \* \* \* \* : \* \* : \* \* \* \* \* \*

**ZEMBOV** FSGLLIVKTVLDHILQKTERGVRLHPLARTAKVKNEVNSFKAALSSLAKHGEYAPFARLL 300  
**CIEBOV** FSGLLIVKTVLDHILQKTEHGVRLHPLARTAKVKNEVNSFKAALSSLAQHGEYAPFARLL 300  
**REBOV** FSGLLIVKTVLDHILQKTDQGVRLHPLARTAKVRNEVNAFKAALSSLAKHGEYAPFARLL 300  
**SEBOV** FSGLLIVKTVLDHILQKTDLGVRLHPLARTAKVKNEVSSFKAALGSLAKHGEYAPFARLL 300  
**BEBOV** FSGLLIVKTVLDHILQKTEHGVRLHPLARTAKVKNEVSSFKAALASLAQHGEYAPFARLL 300  
\* \* \* \* \* \* \* \* \* \* \* \* \* \* : \* \* \* \* \* \* \* \* \* \* \* \* \* \* \* \* \* \* \* \* \* \* \* \* \* \* \* \* \* \* :

**ZEMBOV** NLSGVNNEHGLFPQLSAIALGVATAHGSTLAGVNVGEQYQQLREAATEAEKQLQQYAES 360  
**CIEBOV** NLSGVNNEHGLFPQLSAIALGVATAHGSTLAGVNVGEQYQQLREAATEAEKQLQKYAES 360  
**REBOV** NLSGVNNEHGLYPQLSAIALGVATAHGSTLAGVNVGEQYQQLREAATEAEKQLQQYAES 360  
**SEBOV** NLSGVNNEHGLYPQLSAIALGVATAHGSTLAGVNVGEQYQQLREAATEAEKQLQQYAE 360  
**BEBOV** NLSGVNNEHGLFPQLSAIALGVATAHGSTLAGVNVGEQYQQLREAATEAEKQLQKYAES 360  
\* \* \* \* \* \* \* \* \* \* \* \* \* \* : \* \* \* \* \* \* \* \* \* \* \* \* \* \* \* \* \* \* \* \* \* \* \* \* \* \* \* \* \* \* :

**ZEMBOV** RELDHLGLDDQEKKILMNFHQKKN EISFQQTAMVTLRKERLAKL TEAITAASLPKTS GH 420  
**CIEBOV** RELDHLGLDDQEKKILKDFHQKKN EISFQQTAMVTLRKERLAKL TEAITSTSL LKTGKQ 420  
**REBOV** RELDSLGLDDQERRILMNFHQKKN EISFQQTAMVTLRKERLAKL TEAITLASRPNLGS R 420  
**SEBOV** RELDNLGLDEQEKKILMSFHQKKN EISFQQTAMVTLRKERLAKL TEAITTASIKIVGDR 420  
**BEBOV** RELDHLGLDDQEKKILKDFHQKKN EISFQQTAMVTLRKERLAKL TEAITSTSI LKTGR 420  
\* \* \* \* \* \* \* \* : \* \* : \* \* . \* \* \* \* \* \* \* \* \* \* \* \* \* \* \* \* \* \* \* \* \* \* \* \* : \* : . :

**ZEMBOV** YDDDDDI PFP GPINDDDNPGHQDDDP TSDQDTTIPDVVDPDDG SYGEYQSYSENGMNAP 480  
**CIEBOV** YDDDDNDI PFP GPINDNENSEQQDDDP TSDQDTTIPDI VDPDDGRYNNYGDY PSETANAP 480  
**REBOV** QDDDN EIPFP GPISNPNPDQDHL EDDPRDSRDTIIPNSAIDPEDGDFENYNGYHDDEVGTA 480  
**SEBOV** YPDDNDI PFP GPIYDDTHPNP SDDNPDSDRDTIIPGGVVDYDDESN NYPDYEDSAEGT 480  
**BEBOV** YDDDDNDI PFP GPINDNENSQNDDDP TSDQDTTIPDVI DPNDGGYNNYSDYANDAASAP 480  
\* \* : : \* \* \* \* \* \* \* \* : : . : \* \* \* \* \* \* \* \* \* \* \* \* \* \* \* \* \* \* \* \* \* \* \* \* : \* \* . : \* \* \* . . . :

**ZEMBOV** DDLVLFDLDEDED T KVPNRS TKGGQKNSQK GQHIEGRQTQSRPIQNVPGPHRTI HHA 540  
**CIEBOV** EDLVLFDLEDGDEDDHRPSSSEN NKNHSLTGTDSNK TSNWNRNPTNMPK KDSTQNNDNP 540  
**REBOV** GDLVLFDLDDHEDDNKAFELQDSSPQSQR EIERERLIHPPPGNNKDDNRASDNNQQSADS 540

**SEBOV** GDLDLFLNLDLDDDDSRPGPPDRGQNKERAARTYGLQDPTLDGAKKVPCLTQPGSHQPGNLH 540  
**BEBOV** DDLVLFDFLEDEDDADNPAQNTPEKNDRPATTKLRNGQDQDGNQGETASPRVAPNQYRDKP 540  
\*\* \*\*:\*:\*: : : . . . :

**ZEBOV** SAPLTDNDRRNEPSGSTSPRMLTPINEEADPLDDADDETSSLPPLESDEEQDRDGTSNR 600  
**CIEBOV** AQRAQYARDNIQDTPTPHRALTPISEETGSNGHNEDDIDSIPPLESDEENNTETTITTT 600  
**REBOV** EEQEGQYNRHRGPERTTANRRLSPVHEEDTPIQDQDDDPSSPPPLESDDDDASSSQQDPD 600  
**SEBOV** ITKSGSNTNQPGNMSSTLHSMTPIQEESEPDDQKDNDESLSLSDSEGDEDEDGESISEEN 600  
**BEBOV** MPQVQDRSENHDQTLQQTQSRVLTPISEEADPSDHNDGDNESIPPLESDDGEGSTDTTAAET 600  
. . . : : :\*: \* . . . : : \* . . :\*: \* :

**ZEBOV** TPTVAPPAPVYRDHSEKKELPQDEQQDQDHTQEARNQSDNTQSEHSFEEMYRHILRSQG 660  
**CIEBOV** KNTTAPPAPVYRSNSEKEPLPQEKSQKQPQVSGSENTDNKPHSEQSVEEMYRHILQTTG 660  
**REBOV** YTAVAPPAPVYRSAAEAHEPPHKSSNEPAETSQNLNEDPDIGQSKSMQKLGETYHLLRTQG 660  
**SEBOV** TPTVAPPAPVYKDTGVDTNQQNGPSSTVDSQSGSEALPINSKSSALEETYYHLLKTQG 660  
**BEBOV** KPATAPPAPVYRSISVDDSVPSENIPAQSNQTNNEEDNVRNNAQSEQSIAPMYQHILKTQG 660  
: .\*\*\*\*\*: . . . : : : . . \* \* \*:\*:\*:\*\*

**ZEBOV** PFDVLYYHMMKDEPVVSTSDGKEYTYPDSLEEEYPPWLTEKEAMNEENRFVTLDGQQF 720  
**CIEBOV** PFDAILYMMTEEPIVSTSDGKEYVYPDSLEGEHPPWLSEKEALNEDNRFITMDDQQF 720  
**REBOV** PFEAINYYHMMKDEPVIIFSTDDGKEYTYPDSLEEAAPPWLTEKERLDNENRYIYINNQQF 720  
**SEBOV** PFEAINYYHMSDEPIAFSTESGKEYIFPDSLEEAAPPWLSEKEALEKENRYLVIDGQQF 720  
**BEBOV** PFDAILYHMMKEEPIIFSTSDGKEYTYPDSLEDEYPPWLSEKEAMNEDNRFITMDGQQF 720  
\*\*:\*: \*\*:\*:\*:\*: \*\* .\*\*\*\*\* .\*\*\*\*\* :\*\*\*\*\*:\*\*\* :\*:\*\*\*: :\*.\*\*\*

**ZEBOV** YWPVMNHKNKFMALQHHQ 739  
**CIEBOV** YWPVMNHRNKFMALQHHK 739  
**REBOV** FWPVMSPRDKFLAILQHHQ 739  
**SEBOV** LWPVMSLRDKFLAVLQHD- 738  
**BEBOV** YWPVMNHRNKFMALQHHR 739  
\*\*\*\*. :\*:\*\*\*:\*\*\*\*.
